# Supplementary material for: Inflammatory Markers in Children and Adolescents with Functional Somatic Disorders: A Systematic Review
Source: MDPI journal article supplement (doi:10.3390/children11050549), 2024-05-03
Supplement: s1 [file s1]

## Supplementary Materials

Table S1. Search string, PubMed

|                                             |                                                                                                                                                                                                                                                                                                                                                                                                                                                                                                                                                                                                                                                                                                                                                                                                                                                                                                                                                                                                                                                                                                                                                                                                                                                                                                                                                                                                                                                                                                                                                                                                                                                                                                                                                                                                                                                                                                                                                                                                                                                                                                                                                                                                                                                                                                                                                                                                                                                                                                                                                                                                                                                                                                                                                                                                                                                                                                                                                                                                                                                                                                                                                                                                                                                                                                                         |
|---------------------------------------------|-------------------------------------------------------------------------------------------------------------------------------------------------------------------------------------------------------------------------------------------------------------------------------------------------------------------------------------------------------------------------------------------------------------------------------------------------------------------------------------------------------------------------------------------------------------------------------------------------------------------------------------------------------------------------------------------------------------------------------------------------------------------------------------------------------------------------------------------------------------------------------------------------------------------------------------------------------------------------------------------------------------------------------------------------------------------------------------------------------------------------------------------------------------------------------------------------------------------------------------------------------------------------------------------------------------------------------------------------------------------------------------------------------------------------------------------------------------------------------------------------------------------------------------------------------------------------------------------------------------------------------------------------------------------------------------------------------------------------------------------------------------------------------------------------------------------------------------------------------------------------------------------------------------------------------------------------------------------------------------------------------------------------------------------------------------------------------------------------------------------------------------------------------------------------------------------------------------------------------------------------------------------------------------------------------------------------------------------------------------------------------------------------------------------------------------------------------------------------------------------------------------------------------------------------------------------------------------------------------------------------------------------------------------------------------------------------------------------------------------------------------------------------------------------------------------------------------------------------------------------------------------------------------------------------------------------------------------------------------------------------------------------------------------------------------------------------------------------------------------------------------------------------------------------------------------------------------------------------------------------------------------------------------------------------------------------------|
| <b>FUNCTIONAL<br/>SOMATIC<br/>DISORDERS</b> | "Somatoform Disorders"[Mesh] OR somatoform disorder*[Title/Abstract] OR somatoform symptom*[Title/Abstract] OR somatoform pain*[Title/Abstract] OR somatoform complaint*[Title/Abstract] OR conversion disorder*[Title/Abstract] OR functional neurological disorder*[Title/Abstract] OR bodily distress disorder*[Title/Abstract] OR bodily distress symptom*[Title/Abstract] OR Dissociative Disorders[Mesh] OR dissociative disorder*[Title/Abstract] OR Chronic Fatigue Syndrome[Mesh] OR fatigue syndrome*[Title/Abstract] OR chronic fatigue*[Title/Abstract] OR persistent fatigue*[Title/Abstract] OR prolonged fatigue*[Title/Abstract] OR Fibromyalgia[Mesh] OR fibromyalgi*[Title/Abstract] OR "Psychophysiologic Disorders"[Mesh] OR psychophysiologic disorder*[Title/Abstract] OR psychosomatic disorder*[Title/Abstract] OR psychosomatic symptom*[Title/Abstract] OR psychosomatic complaint*[Title/Abstract] OR psychosomatic illness*[Title/Abstract] OR Tension Type Headache[Mesh] OR functional headach*[Title/Abstract] OR non-specific headach*[Title/Abstract] OR nonspecific headach*[Title/Abstract] OR tension headach*[Title/Abstract] OR tension-type headach*[Title/Abstract] OR tensiontype headach*[Title/Abstract] OR recurrent headach*[Title/Abstract] OR idiopathic headach*[Title/Abstract] OR chronic headach*[Title/Abstract] OR Chronic Pain[Mesh] OR chronic pain*[Title/Abstract] OR chronic limb pain*[Title/Abstract] OR chronic back pain*[Title/Abstract] OR chronic neck pain*[Title/Abstract] OR chronic musculoskeletal pain*[Title/Abstract] OR chronic benign pain*[Title/Abstract] OR functional pain*[Title/Abstract] OR psychogenic pain*[Title/Abstract] OR longstanding pain*[Title/Abstract] OR persistent pain*[Title/Abstract] OR idiopathic pain*[Title/Abstract] OR chronic widespread pain*[Title/Abstract] OR "Colonic Diseases, Functional"[Mesh] OR recurrent abdominal pain*[Title/Abstract] OR functional abdominal pain*[Title/Abstract] OR functional gastrointestinal symptom*[Title/Abstract] OR functional gastrointestinal disorder*[Title/Abstract] OR functional gastrointestinal pain*[Title/Abstract] OR chronic abdominal pain*[Title/Abstract] OR chronic abdominal complaint*[Title/Abstract] OR chronic abdominal symptom*[Title/Abstract] OR irritable bowel syndrome*[Title/Abstract] OR Medically Unexplained Symptoms[Mesh] OR unexplained symptom*[Title/Abstract] OR unexplained complaint*[Title/Abstract] OR unexplained illness*[Title/Abstract] OR unexplained physical symptom*[Title/Abstract] OR unexplained somatic complaint*[Title/Abstract] OR medically unexplained physical symptom*[Title/Abstract] OR nonspecific musculoskeletal symptom*[Title/Abstract] OR non-specific musculoskeletal symptom*[Title/Abstract] OR nonspecific musculoskeletal complaint*[Title/Abstract] OR non-specific musculoskeletal complaint*[Title/Abstract] OR nonspecific musculoskeletal disorder*[Title/Abstract] OR non-specific musculoskeletal disorder*[Title/Abstract] OR nonspecific musculoskeletal pain*[Title/Abstract] OR non-specific musculoskeletal pain*[Title/Abstract] OR idiopathic musculoskeletal pain*[Title/Abstract] OR musculoskeletal complaint*[Title/Abstract] OR functional somatic[Title/Abstract] OR |
|---------------------------------------------|-------------------------------------------------------------------------------------------------------------------------------------------------------------------------------------------------------------------------------------------------------------------------------------------------------------------------------------------------------------------------------------------------------------------------------------------------------------------------------------------------------------------------------------------------------------------------------------------------------------------------------------------------------------------------------------------------------------------------------------------------------------------------------------------------------------------------------------------------------------------------------------------------------------------------------------------------------------------------------------------------------------------------------------------------------------------------------------------------------------------------------------------------------------------------------------------------------------------------------------------------------------------------------------------------------------------------------------------------------------------------------------------------------------------------------------------------------------------------------------------------------------------------------------------------------------------------------------------------------------------------------------------------------------------------------------------------------------------------------------------------------------------------------------------------------------------------------------------------------------------------------------------------------------------------------------------------------------------------------------------------------------------------------------------------------------------------------------------------------------------------------------------------------------------------------------------------------------------------------------------------------------------------------------------------------------------------------------------------------------------------------------------------------------------------------------------------------------------------------------------------------------------------------------------------------------------------------------------------------------------------------------------------------------------------------------------------------------------------------------------------------------------------------------------------------------------------------------------------------------------------------------------------------------------------------------------------------------------------------------------------------------------------------------------------------------------------------------------------------------------------------------------------------------------------------------------------------------------------------------------------------------------------------------------------------------------------|

---

somatic symptom disorder\*[Title/Abstract] OR persistent physical symptom\*[Title/Abstract] OR functional somatic syndrome\*[Title/Abstract] OR non-cardiac chest pain\*[Title/Abstract] OR noncardiac chest pain\*[Title/Abstract] OR hyperventilation syndrome\*[Title/Abstract] OR somatization disorder\*[Title/Abstract] OR "somatic symptom and related disorder"[Title/Abstract] OR "somatic symptoms and related disorder"[Title/Abstract] OR SSRD[Title/Abstract]

---

**INFLAMMATION**

(Inflammation\*[Title/Abstract] OR (Inflammation[MeSH Terms]) OR (Inflammatory response\*[Title/Abstract]) OR (Inflammatory marker\*[Title/Abstract]) OR (Inflammation marker\*[Title/Abstract]) OR (Inflammatory mediator\*[Title/Abstract]) OR (Inflammation mediator\*[Title/Abstract]) OR (Cytokine\*[Title/Abstract]) OR (Low-grade inflammation\*[Title/Abstract]) OR (Proinflammatory marker\*[Title/Abstract]) OR (Proinflammatory mediator\*[Title/Abstract]) OR (Pro-inflammatory marker\*[Title/Abstract]) OR (Pro-inflammatory mediator\*[Title/Abstract]) OR (Inflammation mediators[MeSH Terms]) OR (Cytokines[MeSH Terms]))

---

## Supplementary Information S2

Quality assessment

Review: **Inflammatory Response in Children and Adolescents with Functional Somatic Disorders**

*NEWCASTLE - OTTAWA QUALITY ASSESSMENT SCALE: CASE CONTROL / COHORT STUDIES*

*(Note: A study can be awarded a maximum of one star for each numbered item within the Selection and Exposure categories. A maximum of two stars can be given for Comparability).*

- **Selection:**

1) Is the case definition adequate?

- a) yes, with independent validation \* (the case definition scores positively if accepted diagnostic criteria for FSD were used and an adequate explanation of how this was assessed)
- b) no description

2) Representativeness of the cases

- a) consecutive or obviously representative series of cases \* (if the study included both males and females, the proportion of males to females was representative of the population studies of FSD (i.e. F>M) or were not subject to selection bias. Studies were considered to be subject to selection bias when patients recruited from only one setting, e.g. secondary care clinic only)
- b) potential for selection biases or not stated

3) Selection of Controls:

- a) community controls \* (if the controls were from the same community/geographical location as the cases)
- b) hospital controls
- c) no description

4) Definition of Controls

- a) no history of disease (endpoint) \* (the study had to explicitly state that controls had no history of FSD)
- b) no description of source

- **Comparability:**

5+6) Comparability of cases and controls on the basis of the design or analysis:

- a) study controls for psychiatric comorbidity \*
- b) study controls for physical activity and/or obesity \*

- **Exposure:**

7) Ascertainment of outcome (inflammatory markers):

- a) Secure record (The measure of inflammatory marker concentration: the paper had to explicitly state the concentration of the measured inflammatory markers to score a star for eligibility point) \*

- b) structured interview where blind to case/control status \* (laboratory blinded to samples)
- c) interview not blinded to case/control status
- d) written self report or medical record only
- e) no description

8) Same method of ascertainment for cases and controls:

- a) yes \*
- b) no

9) Non-Response rate

- a) same rate for both groups \*
- b) non respondents described
- c) rate different and no designation
